# Supplementary material
Source: PubMed Central journal article supplement (PMC2945569)

## Supplemental Figure Legends

Fig. S1. CD spectra and melts of native and cleaved  $\alpha_1$ AT variants. *A*, CD spectra of intact control (Wt, blue), P8-P6 Asp (red), and P10 Pro, P9-P6 Asp (green) variants suggest identical, correctly folded native states. *B*, RCL cleavage for the  $\alpha_1$ AT species (at P5 using V8 protease for control and P1 cleavage using thrombin for variants) yielded identical CD spectra that were similar to those obtained for intact  $\alpha_1$ AT. *C*, CD melting profiles of intact  $\alpha_1$ AT control and variants. Melting temperatures ( $T_m$ ) were taken as the X-intercept of the second derivative of the smoothed profiles. *D*, Melting profiles for RCL-cleaved control and variants. No melting was observed for the cleaved control or the cleaved P8-P6 Asp variant up to the highest temperature (95°C), indicating hyperstability. The P10-P6 variant unfolded with a  $T_m$  of 81.0°C.

Fig. S2. SDS-PAGE of the reactions between the  $\alpha_1$ AT control and variants with thrombin. *A*, The control (WT) is the P1 Arg, C232A variant of  $\alpha_1$ AT, and it therefore has been converted to an inhibitor of thrombin. Flanking lanes on all gels contain size standards (as indicated). The first two lanes following the standards are thrombin (IIa) and control (WT) alone. Thrombin and  $\alpha_1$ AT are mixed in the ratios indicated above each lane. For the control, all of the thrombin forms the higher molecular weight complex between 1:1 and 1:2. *B*, The P8-P6 Asp mutant was efficiently cleaved by thrombin (band of lower mobility than control), and formed some complex (higher molecular weight species), but even at 1:300, only about 1/3<sup>rd</sup> of the thrombin has been inhibited. Based on these numbers, an estimate of stoichiometry of inhibition of 900 is calculated, however, we cannot rule out the possibility that the complex has been destabilized by the Asp mutations. *C*, No complex is observed for the P10-P6 variant, and all native variant is efficiently cleaved by thrombin.

Fig. S3. Crystal structures of P1-P1' cleaved  $\alpha_1$ AT variants reveal a normal RCL-inserted conformation. *A*, Cartoon representation of the structure of the thrombin-cleaved P8-P6 Asp variant, with  $\beta$ -sheet A colored red and the RCL in yellow. The P17-P1 region is shown as rods with surrounding electron density ( $2F_o - F_c$ , contoured at  $1\sigma$ ). A close-up of the P9-P4 region is shown on the right, to illustrate how a water molecule and the likely protonation of P5 Glu contribute to stabilizing the RCL-inserted state. *B*, A high-resolution structure of the P10-P6 variant, with a close up of the mutated region on the right.

---

**Table S1. Crystals, data processing, refinement and models**

---

| <b>Crystals</b>                                          | P8-P6                               | P10-P6                                |
|----------------------------------------------------------|-------------------------------------|---------------------------------------|
| Space Group                                              | P2 <sub>1</sub>                     | P2 <sub>1</sub>                       |
| Cell dimensions (Å)                                      | a=37.45 b=83.27 c=61.09<br>β=99.66° | a=37.23 b=121.88 c=43.22<br>β=113.88° |
| Solvent content (%)                                      | 47.3                                | 38.16                                 |
| <b>Data Processing Statistics</b>                        |                                     |                                       |
| Wavelength (Å)                                           | 1.542                               | 0.9795                                |
| Resolution (Å)                                           | 48.80-2.70 (2.85-2.70)              | 34.04-1.50 (1.58-1.50)                |
| Total reflections                                        | 19494                               | 195961                                |
| Unique reflections                                       | 9871                                | 55516                                 |
| <I/σ(I)>                                                 | 14.6 (6.1)                          | 10.4 (2.4)                            |
| Completeness (%)                                         | 96.9 (99.4)                         | 98.9 (98.8)                           |
| Multiplicity                                             | 2.0 (1.9)                           | 3.5 (3.5)                             |
| R <sub>merge</sub>                                       | 0.042 (0.129)                       | 0.068 (0.496)                         |
| <b>Model</b>                                             |                                     |                                       |
| Number of protein/water atoms                            | 2828/22                             | 2979/216                              |
| Average B-factor (Å <sup>2</sup> )                       | 21.1                                | 21.8                                  |
| <b>Refinement statistics</b>                             |                                     |                                       |
| Reflections in working/free set                          | 8867/989                            | 52634/2822                            |
| R-factor/R-free                                          | 21.09/26.79                         | 15.98/21.12                           |
| r.m.s. deviation of bonds(Å)/angles<br>(°) from ideality | 0.003/0.62                          | 0.026/2.08                            |
| Ramachandran plot; residues in                           |                                     |                                       |
| Most favored region (%)                                  | 95.1                                | 98.6                                  |
| Allowed region (%)                                       | 4.6                                 | 1.4                                   |
| Outlier region (%)                                       | 0.3 (Gln393)                        | 0                                     |

---

Fig. S1

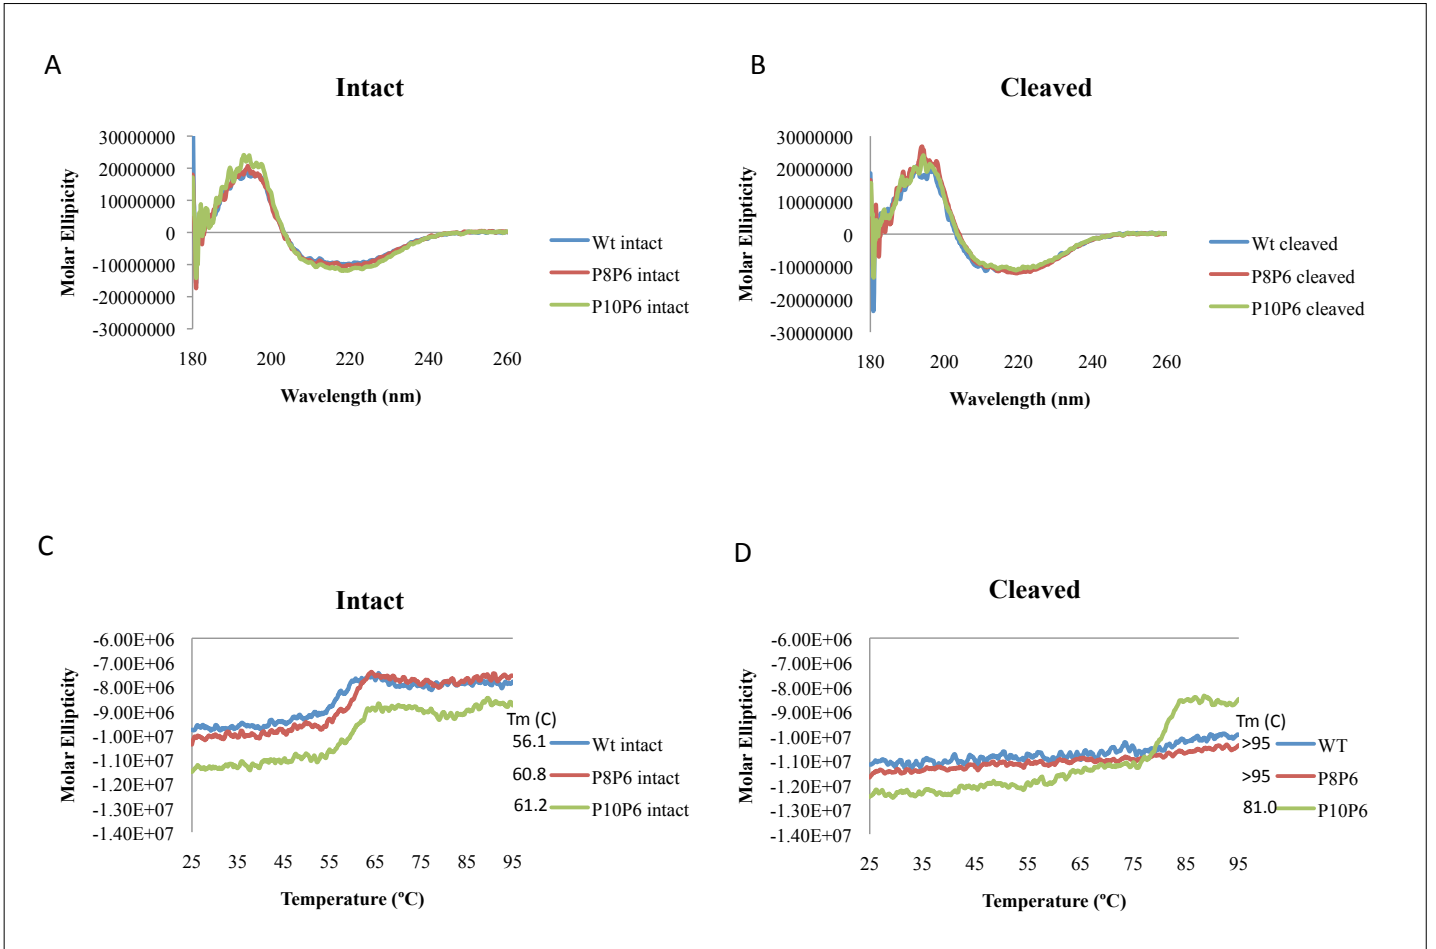

Fig. S2

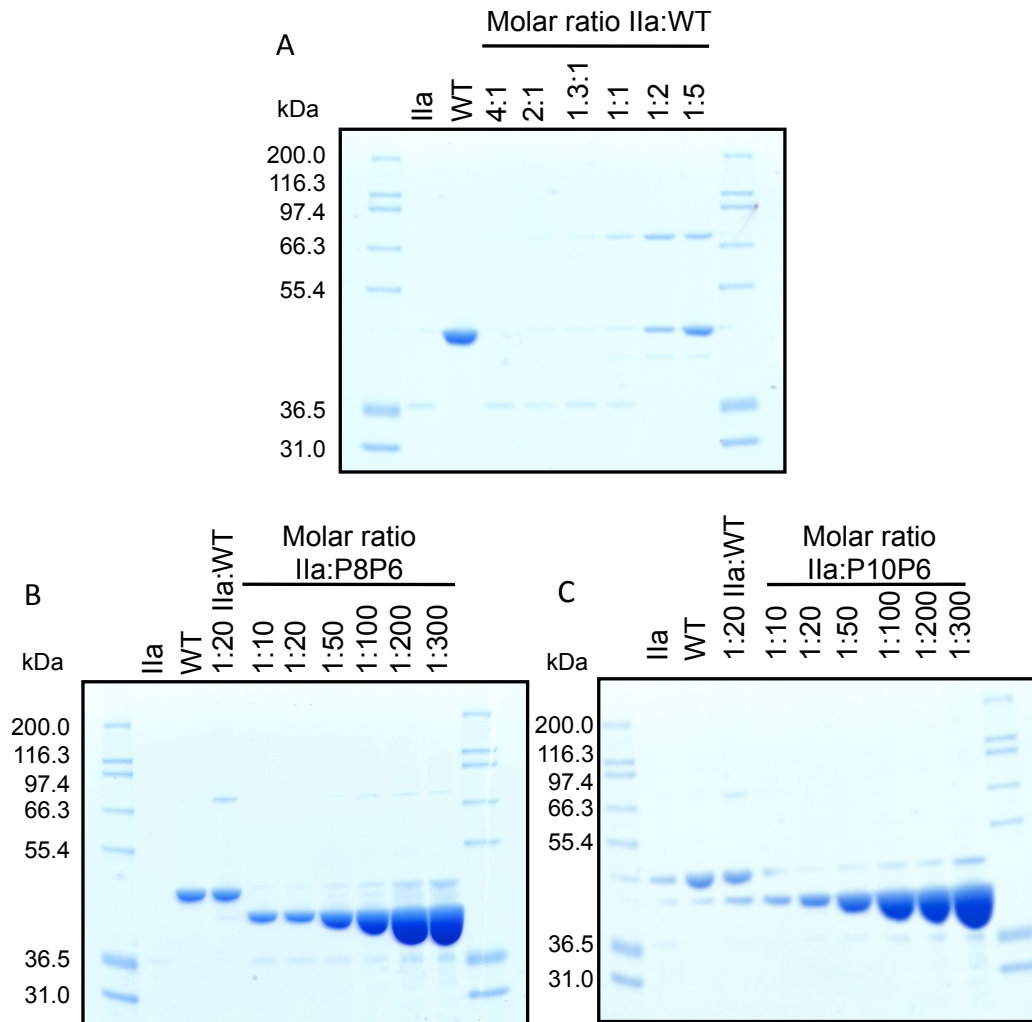



Fig. S3

A

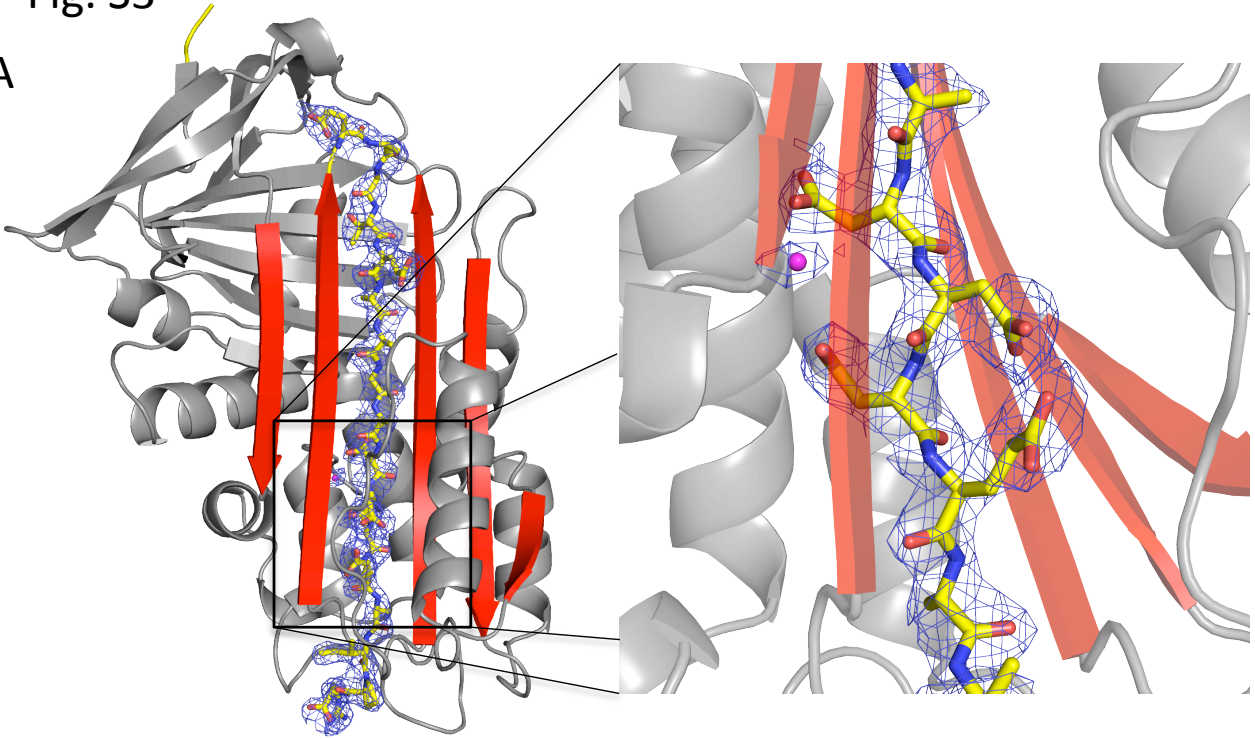

B

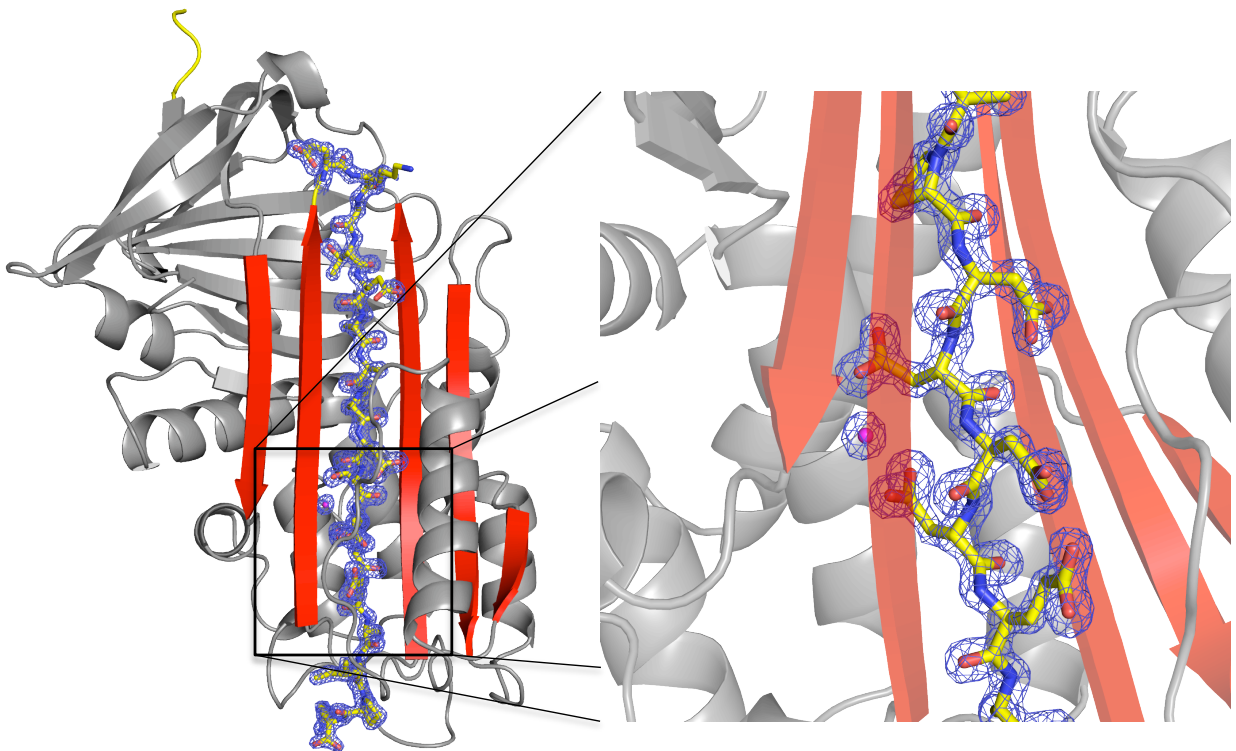

Supplement: supp_M110.156042_jbc.M110.156042-1.pdf [file supp_M110.156042_jbc.M110.156042-1.pdf]
